# Supplementary material for: Factors associated with digital tools use among primary healthcare professionals in Burkina Faso: a cross-sectional study of the Minimal Digital Ecosystem
Source: Research Square preprint supplement (doi:10.21203/rs.3.rs-8501338/v1), 2026-01-14
Supplement: Supplementary file 1 [file 3d122a12ca95fce49292981b.docx]

**EDM-Q2 QUESTIONNAIRE**

|  | **Revised specific objectives** | **Response procedures** | **Target professionals** | **Instructions** |
| --- | --- | --- | --- | --- |
|  | **HEALTH DISTRICT CODE** |  |  |  |
|  | **HEALTH FACILITY CODE** |  |  |  |
|  | **Respondent profile** |  |  |  |
|  | *Q01 : How old are you?* | │__│__│ years |  |  |
|  | *Q02 : What age group do you belong to? (If no answer regarding exact age)* | Under 18 /18-30 years /31-40 years /41-55 years /56 years old and older  |  |  |
|  | *Q03 : Gender of respondent* | Male /Female  |  |  |
|  | *Q04 : What is your level of education?* | None /Primary school /Secondary school (First round) /Secondary school (second round) /High School  |  |  |
|  | *Q05 : What is your marital status?* | Single / In a relationship (monogamy) / In a relationship (polygamy) / Separated/Widowed  |  |  |
|  | *Q06 : Where do you live? (town or neighborhood)* | ……………………………………………………………………. |  |  |
|  | *Q07 : What is your professional category?* | Physician / Pharmacist /SFE/ME /IDE/IB /AA /AB /AIS (ASC) /AV / / Hospital Administrator-Manager / Health attaché / ASSOG /CSIO /Other(specify………………………………………………)  |  |  |
|  | *Q08 : In what year did you first take up your position (recruitment into the civil service)?* | │__│__│__│__│ |  |  |
|  |  |  |  |  |
|  | *Q09 : What is your profile?* | CBHW / Cashier /Manager DMEG / health worker /ECD Member /SISSE /Manager / Facility manager / Implementing actor (*STRFS/DCAPS/DSI/NGO)*/COGES Treasurer  |  |  |
|  | *Q10 : What is your position of responsibility?* | MCD /DRD Manager / Facility manager /PEV manager /Maternity Manager /SISSE /MRACQS /RAF / Regisseurs /None /Other(specify………………………………………………) |  |  |
|  | *Q11 : q08 How long have you held this position of responsibility?* | │__│__│__│ month |  |  |
|  | *Q12 : Since what year have you been working in this healthcare facility?* | |  |  |  |  | | --- | --- | --- | --- | |  |  |
|  | *Q13 : What is your professional category (other than CBHW activity)?* | Cultivator / Breeder / Fisherman / Merchant / Artisan / Spar / Other/ |  | CBHW |
|  | *Q14 : Are you able to read and write in French (If yes, check Literate. If no, check Illiterate)?* | Literate / illiterate  |  |
|  | *Q15 : How far is your home from the health facility?* | Less than 5 km / More than 5 km / |  |
|  | |  |  |  |
| **Analyze the process of deploying MDE tools** | |  |  |  |
|  | *Q16 : What is the total amount budgeted by your organization for the implementation of MDE activities (purchase of equipment, training of stakeholders, monitoring, supervision, coordination, etc.)?* | *## ### ### ###* | *STRFS/DCAPS/DSI/NGO* |  |
|  | *Q17 : What is the total amount actually mobilized by your organization for the implementation of MDE activities (purchase of equipment, training of stakeholders, monitoring, supervision, coordination, etc.)?* | *## ### ### ###* |  |
|  | *Q18 : How many functional tablets/phones do you have in your healthcare facility?* | *##* | *Facility manager* |  |
|  | *Q19 : How many tablets/phones are dedicated to MDE tools?* | *##* |  |
|  | *Q20: Do you consider the number of tablets/phones available in your Health facility (HF) sufficient for the implementation of MDE?* | *Yes/No* |  |
|  | *Q20_1 : If not, why not? (Give 2 to 3 reasons)* | *Text* |  |
|  | *Q20_2 : If not, how many consultation booths are you able to set up?* | *##* |  |
|  | *Q21 : What are the available staff numbers (by profile) in your HF?* |  | *Facility manager* |  |
|  | *State-registered nurses (IDE)* | *##* |  |
|  | *Registered nurses (IB)* | *##* |  |
|  | *Community health workers (AIS)* | *##* |  |
|  | *Midwife/Maieutician (SFE/ME)* | *##* |  |
|  | *Certified midwife (AB)* | *##* |  |
|  | *Auxiliary midwife (AA)* | *##* |  |
|  | *Manager of Essential Generic Medicines Depot (DMEG)* | *##* |  |
|  | *Pediatric health attaché* | *##* |  |
|  | *General physician* | *##* |  |
|  | *CBHW* | *##* |  |
|  | *Other (specify)* | *Text* |  |
|  | *Q22 : Are these numbers sufficient for the implementation of MDE?* | *Yes/No* |  |
|  | *Q18_1 : If not, give 2 or 3 reasons.* | *Text* |  |
|  | *Q23 : When did you start using MDE tools in your HF ?* |  | *Facility manager* |  |
|  | *E-Qualité* | *##/#### month/year* |  |
|  | *E-Flux financier* | *##/#### month/year* |  |
|  | *REC-Maternité* | *##/#### month/year* |  |
|  | *REC-PCIME* | *##/#### month/year* |  |
|  | *E-SantéCom* | *##/#### month/year* |  |
|  | *NetSIGL 2.0* | *##/#### month/year* |  |
|  | *FIS* | *##/#### month/year* |  |
|  | *E-Gratuité* | *##/#### month/year* |  |
|  | *Q24 : How many agents have been trained on MDE tools?* |  | *Facility manager* |  |
|  | ***E-Qualité*** |  |  |
|  | *State-registered nurses (IDE)* | *##* |  |
|  | *Registered nurses (IB)* | *##* |  |
|  | *Community health workers (AIS)* | *##* |  |
|  | *Midwife/Maieutician (SFE/ME)* | *##* |  |
|  | *Certified midwife (AB)* | *##* |  |
|  | *Auxiliary midwife (AA)* | *##* |  |
|  | *Manager of Essential Generic Medicines Depot (DMEG)* | *##* |  |
|  | *Pediatric health attaché* | *##* |  |
|  | *General physician* | *##* |  |
|  | *CBHW* | *##* |  |
|  | *Other (specify)* | *##* |  |
|  | ***E-Flux financier*** |  |  |
|  | *State-registered nurses (IDE)* | *##* |  |
|  | *Registered nurses (IB)* | *##* |  |
|  | *Community health workers (AIS)* | *##* |  |
|  | *Midwife/Maieutician (SFE/ME)* | *##* |  |
|  | *Certified midwife (AB)* | *##* |  |
|  | *Auxiliary midwife (AA)* | *##* |  |
|  | *Manager of Essential Generic Medicines Depot (DMEG)* | *##* |  |
|  | *Pediatric health attaché* | *##* |  |
|  | *General physician* | *##* |  |
|  | *CBHW* | *##* |  |
|  | *Other (specify)* | *##* |  |
|  | ***REC- Maternité*** |  |  |
|  | *State-registered nurses (IDE)* | *##* |  |
|  | *Registered nurses (IB)* | *##* |  |
|  | *Community health workers (AIS)* | *##* |  |
|  | *Midwife/Maieutician (SFE/ME)* | *##* |  |
|  | *Certified midwife (AB)* | *##* |  |
|  | *Auxiliary midwife (AA)* | *##* |  |
|  | *Manager of Essential Generic Medicines Depot (DMEG)* | *##* |  |
|  | *Pediatric health attaché* | *##* |  |
|  | *General physician* | *##* |  |
|  | *CBHW* | *##* |  |
|  | *Other (specify)* | *##* |  |
|  | ***REC-PCIME*** |  |  |
|  | *State-registered nurses (IDE)* | *##* |  |
|  | *Registered nurses (IB)* | *##* |  |
|  | *Community health workers (AIS)* | *##* |  |
|  | *Midwife/Maieutician (SFE/ME)* | *##* |  |
|  | *Certified midwife (AB)* | *##* |  |
|  | *Auxiliary midwife (AA)* | *##* |  |
|  | *Manager of Essential Generic Medicines Depot (DMEG)* | *##* |  |
|  | *Pediatric health attaché* | *##* |  |
|  | *General physician* | *##* |  |
|  | *CBHW* | *##* |  |
|  | *Other (specify)* | *##* |  |
|  | ***E-SantéCom*** |  |  |
|  | *State-registered nurses (IDE)* | *##* |  |
|  | *Registered nurses (IB)* | *##* |  |
|  | *Community health workers (AIS)* | *##* |  |
|  | *Midwife/Maieutician (SFE/ME)* | *##* |  |
|  | *Certified midwife (AB)* | *##* |  |
|  | *Auxiliary midwife (AA)* | *##* |  |
|  | *Manager of Essential Generic Medicines Depot (DMEG)* | *##* |  |
|  | *Pediatric health attaché* | *##* |  |
|  | *General physician* | *##* |  |
|  | *CBHW* | *##* |  |
|  | *Other (specify)* | *##* |  |
|  | ***NetSIGL 2.0*** | *##* |  |
|  | *State-registered nurses (IDE)* | *##* |  |
|  | *Registered nurses (IB)* | *##* |  |
|  | *Community health workers (AIS)* | *##* |  |
|  | *Midwife/Maieutician (SFE/ME)* | *##* |  |
|  | *Certified midwife (AB)* | *##* |  |
|  | *Auxiliary midwife (AA)* | *##* |  |
|  | *Manager of Essential Generic Medicines Depot (DMEG)* | *##* |  |
|  | *Pediatric health attaché* | *##* |  |
|  | *General physician* | *##* |  |
|  | *CBHW* | *##* |  |
|  | *Other (specify)* | *##* |  |
|  | ***FIS*** |  |  |
|  | *State-registered nurses (IDE)* | *##* |  |
|  | *Registered nurses (IB)* | *##* |  |
|  | *Community health workers (AIS)* | *##* |  |
|  | *Midwife/Maieutician (SFE/ME)* | *##* |  |
|  | *Certified midwife (AB)* | *##* |  |
|  | *Auxiliary midwife (AA)* | *##* |  |
|  | *Manager of Essential Generic Medicines Depot (DMEG)* | *##* |  |
|  | *Pediatric health attaché* | *##* |  |
|  | *General physician* | *##* |  |
|  | *CBHW* | *##* |  |
|  | *Other (specify)* | *##* |  |
|  | **E-Gratuité** |  |  |
|  | *State-registered nurses (IDE)* | *##* |  |  |
|  | *Registered nurses (IB)* | *##* |  |
|  | *Community health workers (AIS)* | *##* |  |
|  | *Midwife/Maieutician (SFE/ME)* | *##* |  |
|  | *Certified midwife (AB)* | *##* |  |
|  | *Auxiliary midwife (AA)* | *##* |  |
|  | *Manager of Essential Generic Medicines Depot (DMEG)* | *##* |  |
|  | *Pediatric health attaché* | *##* |  |
|  | *General physician* | *##* |  |
|  | *CBHW* | *##* |  |
|  | *Other (specify)* | *##* |  |
|  | *Q25: How many financial, material, and medication audits has the DRSHP team carried out for ECDs over the last six months?* | *##* | *RAF, Pharmacie district* |  |
|  | *Q26 : How many financial, material, and medication audits are carried out by the DRSHP team on behalf of the CMAs?* | *##* | *Gestionnaire CMA* |  |
|  | *Q27 : Does your HF have resources or budget lines in their action plan to ensure the maintenance or replacement/renewal of equipment (tablets, accessories)?* | *Yes/No* | *Facility manager* |  |
|  | *If not, why not? (Give 2 to 3 reasons)* | *Text* |  |
|  | *Q28 : Does your FS have a power source?* | *Yes/No* |  |
|  | *If not, why not? (Give 2 to 3 reasons)* | *Text* |  |
|  | *If so, what is the source?* | *Plaque solaire/ SONABEL/ Goupe electrogène/ Autre* | *(Multiple choice)* |
|  | *Q29 : Does your FS have functional rolling logistics for the advanced strategy?* | Yes/No |  |
|  | *If not, why not? (Give 2 to 3 reasons)* | *Text* |  |
|  | *Q30 : Which MDE tool are you promoting?* | *E-Qualité/E-gratuité/…..* | *ONG/MSHP* | Multiple tools can be selected. Set by tool |
|  | *Q31 : How much does development cost?* | *### ### ###* |
|  | *Q32 : How much does it cost to purchase the equipment?* | *### ### ###* |
|  | *Q33 : How much does staff training cost?* | *### ### ###* |
|  | *Q34 : How much does deployment and implementation cost?* | *### ### ###* |
|  | *Q35 : How much does maintenance and technical support cost?* | *### ### ###* |
|  | *Q36 : How much does supervision/coaching cost?* | *### ### ###* |
| **Identify the technological factors influencing the use of MDE tools (tool malfunctions, internet connection problems)** | | | | |
|  | *Q37 : Is your HF covered by the internet network?* | Yes/No | *Facility manager* |  |
|  | *Q38 : Does your HF have the resources to purchase an internet subscription?* | Yes/No |  |
| **Identify the technological factors influencing the use of MDE tools (tool malfunctions, internet connection problems)** | | |  |  |
|  | *Q39 : For each of the MDE tools, how many days did you experience a malfunction during the last month? (If less than 24 hours, consider it one day.)* |  | *Facility manager* |  |
|  | *E-Qualité* | ## |  |
|  | *E-Flux financier* | ## |  |
|  | *REC-Maternité* | ## |  |
|  | *REC-PCIME* | ## |  |
|  | *E-SantéCom* | ## |  |
|  | *NetSIGL 2.0* | ## |  |
|  | *FIS* | ## |  |
|  | *E-Gratuité* | ## |  |
|  | *Q40 : What is the nature of the malfunction observed?* |  | *Facility manager* |  |
|  | *E-Qualité* | Text |  |
|  | *E-Flux financier* | Text |  |
|  | *REC-Maternité* | Text |  |
|  | *REC-PCIME* | Text |  |
|  | *E-SantéCom* | Text |  |
|  | *NetSIGL 2.0* | Text |  |
|  | *FIS* | Text |  |
|  | *E-Gratuité* | Text |  |
|  | *Q41 : Did repairing the malfunction require external intervention outside your HF?* |  | *Facility manager* |  |
|  | *E-Qualité* | Yes/No |  |
|  | *E-Flux financier* | Yes/No |  |
|  | *REC-Maternité* | Yes/No |  |
|  | *REC-PCIME* | Yes/No |  |
|  | *E-SantéCom* | Yes/No |  |
|  | *NetSIGL 2.0* | Yes/No |  |
|  | *FIS* | Yes/No |  |
|  | *E-Gratuité* | Yes/No |  |
| **Analyze the user experience with MDE, including tool acceptability and adoption, ease of use, stakeholder satisfaction, and determining factors (energy source, human resources)** | | | | |  |
|  | Q42 : Which MDE tool do you use? (If you use multiple tools, ask each of the questions in sections 3.4 and 3.6 for each tool) | REC-Maternité / REC-PCIME / NetSIGL 2.0 / E-gratuité / E-Qualité /E-flux-Financier / FIS  / E-SantéCom  / None  |  |  |
|  | Q43: Do you think that the [*name of tool]* has made the work of healthcare staff easier? | *Yes/No/unknown* | *All users* |  |
|  | If not, give two or three reasons | *1…………………………. 2…………………..………… 3……………………………* |
|  | Q44 : Do you find that the REC-Maternité tool facilitates consultations/post-abortion care/childbirth/CPN/prenatal and postnatal care? | *Yes/No* | Only REC-Maternity |
|  | If not, give two or three reasons. | *1…………………………. 2…………………..………… 3……………………………* |  |
|  | Q45: Do you find that the REC-PCIME tool facilitates curative consultations for children? | *Yes/No* | Only REC- PCIME |
|  | If not, give two or three reasons | *1…………………………. 2…………………..………… 3……………………………* |  |
|  | Q46 : Do you find that the E-gratuité tool facilitates the transmission of reports? | *Yes/No* | Only E-gratuité |
|  | If not, give two or three reasons. | *1…………………………. 2…………………..………… 3……………………………* |  |
|  | Q47: Do you find that the E-Quality tool facilitates healthcare quality management? | *Yes/No* | OnlyE-Qualité |
|  | If not, give two or three reasons. | *1…………………………. 2…………………..………… 3……………………………* |  |
|  | Q48: Do you find that the E-flux-Financier tool optimizes financial management? | *Yes/No* | Only E-flux-Financier |
|  | If not, give two or three reasons | *1…………………………. 2…………………..………… 3……………………………* |  |
|  | Q49: Do you find that the FIS tool optimizes the management of free invoices? | *Yes/No* | Only FIS |
|  | If not, give two or three reasons. | *1…………………………. 2…………………..………… 3……………………………* |  |
|  | Q50: Do you think that the E-SantéCom tool improves CBHW services? | *Yes/No* | Only E-SantéCom |
|  | If not, give two or three reasons. | *1…………………………. 2…………………..………… 3……………………………* |  |
|  | Q51: Do you find that the tool [*name of tool*] requires extra effort on your part? | *Yes/No/Unknown* |  |
|  | If so, give 2 or 3 examples | *1…………………………. 2…………………..………… 3……………………………* |  |
|  | Q52: Do you think that most of your colleagues use at least one MDE tool? | *Yes/No/Unknown* |  |
|  | If not, give two or three reasons. | 1*1…………………………. 2…………………..………… 3……………………………* |  |
|  | *Q53: Do you think that rolling out the tool nationwide will have a positive impact on Burkina Faso's healthcare system?* | *Yes/No/Unknown* |  |
|  | If so, give two or three examples of positive impacts | *1…………………………. 2…………………..………… 3……………………………* |  |
|  | If not, give two or three reasons. | *1…………………………. 2…………………..………… 3……………………………* |  |
|  | *When using REC-Maternité and E-flux-Financier (When using multiple tools, ask each of the questions in sections 3.4 and 3.6 for each tool)* | |  |  |
|  | *Q54: How do you rate the use of the [tool] in the context of MDE?* | *Very difficult /Difficult /* *Easy /Very Easy * | *All users* |  |
|  | *If very difficult or difficult, list two or three reasons* | *1…………………………. 2…………………..………… 3……………………………* |  |
|  | *Q55: Have you received formal training in the use of the [tool] in the context of MDE?* | *Yes /No * |  |
|  | *Q56: When did this formal training take place?* | *Months and years* |  |
|  | *Q57: How long did this training last?* | *│__│__│ Days* |  |
|  | *Q58: What do you think about the length of formal training?* | *Too long /* *Correct/* *Too short * |  |
|  | *Q59: At the end of this formal training, I find that...* |  |  |
|  | *- The materials used for the training were:* | *0-* *Not at all Satisfactory /1-* *Not Satisfactory /2-* *Satisfactory /3-* *Very Satisfactory * |  |
|  | *List two or three points of dissatisfaction.* | *1…………………………. 2…………………..………… 3……………………………* |  |
|  | *- The training was facilitated by:* | *0-* *Not at all Satisfactory /1-* *Not Satisfactory /2-* *Satisfactory /3-* *Very Satisfactory * |  |
|  | *List two or three points of dissatisfaction* | *1…………………………. 2…………………..………… 3……………………………* |  |
|  | *- The level of the trainers was:* | *0-* *Not at all Satisfactory /1-* *Not Satisfactory /2-* *Satisfactory /3-* *Very Satisfactory * |  |
|  | *List two or three points of dissatisfaction* | *1…………………………. 2…………………..………… 3……………………………* |  |
|  | *Q60: Did the formal training meet your expectations?* | *Yes /No * |  |
|  | *Q61: If not, list two or three reasons* | *1…………………………. 2…………………..………… 3……………………………* |  |
|  | *After the formal training, did I acquire the knowledge necessary to use the tool?* | *0-* *Completely disagree. /1-* *Disagree /2-* *Agree /3-* *Completely agree * |  |
|  | *If you disagree or strongly disagree, what limitations remain?* | *1…………………………. 2…………………..………… 3……………………………* |  |
|  | *Are you comfortable using the tool after formal training?* | *Yes /No * |  |
|  | *If not, list two or three reasons* | *1…………………………. 2…………………..………… 3……………………………* |  |
|  | *List two or three areas for improvement in this formal training* | *1…………………………. 2…………………..………… 3……………………………* |  |
|  | *Have you received peer training (informal) on how to use the tool in the context of MDE?* | *Yes /No * |  |  |
|  | *How long did this training last?* | *│__│__│ Jours* | *All users* |  |
|  | *What do you think about the length of the peer training?* | *Too long /* *Correct/* *Too short * |  |
|  | *Compared to peer training, I am:* | *0-* *Not at all satisfied /1-* *Not satisfied /2-* *Satisfied /3-Very Satisfied * |  |
|  | *List two or three points of dissatisfaction* | *1…………………………. 2…………………..………… 3……………………………* |  |
|  | *Did peer training meet your expectations?* | *Yes/No * |  |
|  | *If not, please explain why.* | *…………………………………………………………………………………………* |  |
|  | *After peer training, did I acquire the knowledge necessary to use the tool?* | *0-* *Completely disagree. /1-* *Disagree /2-* *Agree /3-* *Completely agree * |  |
|  | *If you disagree or strongly disagree, what limitations remain?* | *1…………………………. 2…………………..………… 3……………………………* |  |
|  | *Are you comfortable using the tool after peer training?* | *Yes /No * |  |
|  | *If not, why not?* | *…………………………………………………………………………………………* |  |
|  | *“I am proficient or comfortable using the tool.” Do you agree with this statement?* | *0-* *Completely disagree. /1-* *Disagree /2-* *Agree /3-* *Completely agree * |  |
|  | *List two or three areas for improvement in the tool* | *1…………………………. 2…………………..………… 3……………………………* |  |
|  | *How many times have you used the MDE tool?* | *1-2 times  /3-4 times  / 5-6 times  / More than 6 times * |  |
|  | *Quelle est votre attitude vis-à-vis de l'outil MDE?* | *Positive (Favorable)  / Negative (Unfavorable) * |  |
|  | *How satisfied are you with the tool?* | *0-* *Not at all satisfied /1-* *Not satisfied /2-* *Satisfied /3-Very Satisfied * |  |
|  | *Does your HF organize care for the indigent, social cases, and patients without companions?* | Yes/No | *Facility manager* |  |
|  | *If not, why not? (Give 2 to 3 reasons)* | Text |  |
|  | *Does your HF organize continuing education refresher courses?* | Yes/No | *Facility manager* |  |
|  | *If not, why not? (Give 2 to 3 reasons)* | Text |  |
|  | *Does your HF apply financial management procedures (availability of financial management texts and procedures)?* | Yes/No | *Facility manager* |  |
|  | *If not, why not? (Give 2 to 3 reasons)* | Text |  |
|  | *Does your HF pay its suppliers for essential generic drugs on time?* | Yes/No |  |
|  | *Does your HF pay its cleaning service providers on time?* | Yes/No |  |
|  | *Does your HF pay its security service providers on time?* | Yes/No |  |
|  | *Does your HF have a manual for managing stocks of medicines and consumables?* | Yes/No | *Facility manager* |  |
|  | *If yes, management manual seen* | Yes/No |  |
|  | *If not, why not? (Give 2 to 3 reasons)* | Text |  |
|  | *Does your HF have tools for managing stocks of medicines and consumables?* | Yes/No |  |
|  | *Does your HF have a functional power backup source?* | Yes/No | *Facility manager* |  |
|  | *If not, why not? (Give 2 to 3 reasons)* | Text |  |
|  | *Does your HF have a maintenance system for energy source installations?* | Yes/No |  |
|  | *Did your HF experience an energy outage last month?* | Yes/No |  |
|  | *Does your HF provide maintenance for hardware and equipment?* | Yes/No | *Facility manager* |  |
|  | *Does your HF have an up-to-date dashboard of recommendations and their implementation plan?* | Yes/No | *Facility manager* |  |
|  | *Does your HF have a plan for monitoring the implementation of the recommendations?* | Yes/No |  |
|  | *Does your HF document the actions taken in response to the recommendations?* | Yes/No |  |
|  | *Does your HF have reference and cross-reference sheets?* | Yes/No | *Facility manager* |  |
|  | *Does your HF have a procedure and tools for managing user rejection of references?* | Yes/No |  |
|  | *Does your HF have a room for the EPI and a cold chain?* | Yes/No | *Facility manager* |  |
|  | *Does your HF have a vaccination schedule?* | Yes/No |  |
|  | *Does your HF have a system for locating people who have lost touch?* | Yes/No |  |
|  | *If so, give an example* | Text |  |
|  | *Does your HF have a system for collecting complaints and suggestions from users?* | Yes/No | *Facility manager* |  |
|  | *Does your HF have a system for managing user complaints and suggestions?* | Yes/No |  |
